# Supplementary material
Source: HighWire-hosted journal article supplement (http://mentalhealth.bmj.com/highwire/filestream/68229/field_highwire_adjunct_files/2/74112table.pdf)
Supplement: 74112table.pdf [file 74112table.pdf]

Proportion of people reaching endpoint at 60 weeks

| <b>Endpoint</b>             | <b>Donepezil</b> | <b>Placebo</b> | <b>p Value</b> |
|-----------------------------|------------------|----------------|----------------|
| Entry to institutional care | 9%               | 14%            | 0.15           |
| Progression of disability   | 13%              | 19%            | 0.30           |
